# Supplementary material for: Two-dimensional crystalline covalent triazine frameworks via dual modulator control for efficient photocatalytic oxidation of sulfides
Source: Royal Society of Chemistry journal article supplement (doi:10.1039/d1ta03951b), 2021-01-01
Supplement: d1ta03951b1.pdf [file d1ta03951b1.pdf]

# Two-Dimensional Crystalline Covalent Triazine Frameworks via Dual Modulator Control for Efficient Photocatalytic Oxidation of Sulfides

*Xuepeng Wang, Siquan Zhang, Xia Li, Zhen Zhan, Bien Tan, Xianjun Lang, and Shangbin Jin\**

## Table of Contents

1. Materials and characterization
2. Synthesis of CTF materials
3. Photocatalytic oxidation of sulfide
4. PXRD patterns of CTF-HUST-D1 and CTF-HUST-E1 synthesized under different conditions
5. SEM images and Brunauer-Emmett-Teller (BET) surface areas of CTF-HUST-D1 and CTF-HUST-E1.
6. TEM images of CTF-HUST-D1 and CTF-HUST-E1
7. HAADF-STEM and mapping image of CTF-HUST-D1 and CTF-HUST-E1
8. Thermal stability of CTF-HUST-D1 and CTF-HUST-E1
9. Powder X-ray diffraction patterns and FT-IR spectra of CTF-HUST-D2
10. Structural characterization of CTF-HUST-D2
11. HR-TEM images of CTF-HUST-D2
12. Thermal stability of CTF-HUST-D2
13. N<sub>2</sub> adsorption and desorption isotherms and SEM images of CTF-HUST-D2
14. In-situ ESR signals of DMPO-O<sub>2</sub><sup>-</sup>
15. UV-Visible diffuse reflectance spectrum of CTF-HUST-D1, CTF-HUST-E1 and CTF-HUST-D2
16. Electrochemical impedance of CTFs
17. Photoluminescence spectra of CTF-HUST-D1, CTF-HUST-E1 and CTF-HUST-D2
18. Optical band gaps and Mott-Schottky of CTFs
19. The FWHM and ordinate intensity of the (100) plane for different CTFs.
20. Elemental analysis of CTF-HUST-D1 and CTF-HUST-E1 and CTF-HUST-D2
21. Comparison of different samples for photocatalytic selective oxidation of thioanisole
22. Quenching experiments of CTF-HUST-D2
23. Comparison of the photocatalytic performance of CTF-HUST-D2 with reported results
24. References

## 1. Materials and Characterization

*p*-phthalaldehyde, cesium carbonate ( $\text{Cs}_2\text{CO}_3$ ), *p*-phthalaldehyde, 4-(hydroxymethyl)benzaldehyde, 2,5-dimethoxyterephthal-aldehyde, terephthalamidine, aniline, *p*-toluidine, 2,4,6-trimethylaniline, 4-bromoaniline, toluene, mesitylene, *n*-Hexadecane, *o*-dichlorobenzene(*o*-DCB), benzene-1,4-dicarbonitrile, lithium bis(trimethylsilyl)amide, *N,N*-dimethylformamide (DMF), tetrahydrofuran (THF) and dimethyl sulfoxide (DMSO) were purchased from Aladdin reagent (Shanghai) Co., Ltd. And terephthalamidine dihydrochloride was synthesized following the reported method.<sup>[1]</sup> All these chemicals were directly used without further purification. The characterization of materials are referred to the literature previously reported by our group.<sup>[1]</sup>

## 2. Synthesis of CTF materials

The general synthesis procedure: a mixture of aldehyde monomer (0.5 mmol), terephthalamidine (1.0 mmol),  $\text{Cs}_2\text{CO}_3$  (2.2 mmol), aniline derivatives (according to actual experiments required) and DMSO or other mixed solvents (10 mL) were added into a flask. Then the reaction was heated at 100 °C for 24 h, 120 °C for 24 h and 160 °C for 48 h. After cooling to the room temperature, the mixture was washed with DMF and water. The detailed process is as follows.

### 2.1 Synthesis of the CTFs under different optimization conditions

#### 2.1.1 Optimization of aniline modulators

CTF-HUST-D1: The mixture of *p*-phthalaldehyde (0.5 mmol), terephthalamidine (1.0 mmol),  $\text{Cs}_2\text{CO}_3$  (2.2 mmol), aniline modulators (3.0 mmol: aniline, *p*-toluidine, 2,4,6-trimethylaniline, or 4-bromoaniline) and DMSO (10 mL) were added into a single neck flask (25 mL). Then the reaction was heated at 100 °C for 24 h, 120 °C for 24 h and 160 °C for 48 h. After cooling to the room temperature, the mixture was poured into 150 mL 0.1 M HCl aqueous, washed with DMF twice, then with water once (at least 10 h each time) and finally the sample was freeze-dried. The products are gray-yellow powders (aniline: 0.149 g, yield: 71%; *p*-toluidine: 0.141 g, yield: 67%; 2,4,6-trimethylaniline: 0.112 g, yield: 53%; 4-bromoaniline: 0.101 g, yield: 49%). The synthesis process of the CTF-HUST-d1 was the same condition in the absence of aniline modulators (0.145 g, 69%).

#### 2.1.2 Optimization of *p*-toluidine ratio

CTF-HUST-D1: The mixture of *p*-phthalaldehyde (0.5 mmol), terephthalamidine (1.0 mmol),  $\text{Cs}_2\text{CO}_3$  (2.2 mmol), *p*-toluidine (1.0 mmol, 3.0 mmol, 6.0 mmol and 9.0 mmol) and DMSO (10 mL) were added into a single neck flask (25 mL). Then the reaction was heated at 100 °C for 24 h, 120 °C for 24 h and 160 °C for 48 h. After cooling the room temperature, the mixture was poured into 150 mL 0.1M HCl aqueous, washed with DMF twice, then with water once (at least 10 h each time) and finally the sample was freeze-dried. The products are gray-yellow powders (0.165 g, 79%; 0.141 g, 67%; 0.109 g, 52%; 0.092 g, 44%).

CTF-HUST-E1: The mixture of 4-(hydroxymethyl)benzaldehyde (0.5 mmol), terephthalamidine (1.0 mmol), Cs<sub>2</sub>CO<sub>3</sub> (2.2 mmol), *p*-toluidine (0.5 mmol, 1.0 mmol, or 1.5 mmol) and DMSO (10 mL) were added into a single neck flask (25 mL). Then the reaction was heated at 100 °C for 24 h, 120 °C for 24 h and 160 °C for 48 h. After cooling to the room temperature, the mixture was poured into 150 mL 0.1 M HCl aqueous, washed with DMF twice, then with water once (at least 10 h each time) and finally the sample was freeze-dried. The products are gray-yellow powders (0.167 g, 80%; 0.146 g, 70%; 0.121 g, 58%). The synthesis process of the CTF-HUST-e1 was the same condition in the absence of *p*-toluidine (0.167 g, 80%).

### 2.1.3 Optimization of mixed solvents

CTF-HUST-D1: The mixture of *p*-phthalaldehyde (0.5 mmol), terephthalamidine (1.0 mmol), Cs<sub>2</sub>CO<sub>3</sub> (2.2 mmol), *p*-toluidine (3.0 mmol), DMSO (5.0 mL) and another solvent (5.0 mL, toluene, *n*-hexadecane, *o*-DCB or mesitylene) were added into a single neck flask (25 mL). Then the reaction was heated at 100 °C for 24 h, 120 °C for 24 h and 160 °C for 48 h. After cooling to the room temperature, the mixture was poured into 150 mL 0.1 M HCl aqueous, washed with DMF twice, then with water once (at least 10 h each time) and finally the sample was freeze-dried. The products were gray-yellow powder (toluene: 0.115 g, yield: 55%, *n*-hexadecane: 0.129 g, yield: 62%, *o*-DCB: 0.148 g, yield: 71%, mesitylene: 0.152 g, yield: 73%).

CTF-HUST-E1: The mixture of 4-(hydroxymethyl)benzaldehyde (0.5 mmol), terephthalamidine (1.0 mmol), Cs<sub>2</sub>CO<sub>3</sub> (2.2 mmol), *p*-toluidine (1.0 mmol), DMSO (5.0 mL) and another solvent (5.0 mL, toluene, *n*-hexadecane, *o*-DCB or mesitylene) were added into a single neck flask (25 mL). Then the reaction was heated at 100 °C for 24 h, 120 °C for 24 h and 160 °C for 48 h. After cooling to the room temperature, the mixture was poured into 150 mL 0.1 M HCl aqueous, washed with DMF twice, then with water once (at least 10 h each time) and finally the sample was freeze-dried. The products are gray-yellow powders (toluene: 0.109 g, yield: 52%, *n*-hexadecane: 0.128 g, yield: 61%, *o*-DCB: 0.139 g, yield: 66%, mesitylene: 0.132 g, yield: 62%).

### 2.1.4 Optimization of mixed solvents ratio

CTF-HUST-D1: The mixture of *p*-phthalaldehyde (0.5 mmol), terephthalamidine (1.0 mmol), Cs<sub>2</sub>CO<sub>3</sub> (2.2 mmol), *p*-toluidine (3.0 mmol), DMSO/*o*-DCB (10 mL, V<sub>DMSO</sub>/V<sub>*o*-DCB</sub> = 3/1, 1/1, 1/3, 1/6) were added into a single neck flask (25 mL). Then the reaction was heated at 100 °C for 24 h, 120 °C for 24 h and 160 °C for 48 h. After cooling the room temperature, the mixture was poured into 150 mL 0.1M HCl aqueous, washed with DMF twice, then with water once (at least 10 h each time) and finally the sample was freeze-dried. The products were gray-yellow powder (0.151 g, 72%; 0.148 g, 71%; 0.137 g, 65%; 0.117 g, 56%).

CTF-HUST-E1: The mixture of 4-(hydroxymethyl)benzaldehyde (0.5 mmol), terephthalamidine (1.0 mmol), Cs<sub>2</sub>CO<sub>3</sub> (2.2 mmol), *p*-toluidine (1.0 mmol), DMSO/*o*-DCB (10 mL, V<sub>DMSO</sub>/V<sub>*o*-DCB</sub> = 3/1, 1/1, 1/3) were added into a single neck flask (25 mL). Then the reaction was heated at 100 °C for 24 h, 120 °C for 24 h and 160 °C for 48 h. After

cooling to the room temperature, the mixture was poured into 150 mL 0.1 M HCl aqueous, washed with DMF twice, then with water once (at least 10 h each time) and finally the sample was freeze-dried. The products are gray-yellow powders (0.143 g, 68%; 0.139 g, 66%; 0.135 g, 63%).

### 2.1.5 Synthesis of CTF-HUST-D2

The mixture of 2,5-dimethoxyterephthalaldehyde (0.5 mmol), terephthalamidine (1.0 mmol), Cs<sub>2</sub>CO<sub>3</sub>, (2.2 mmol), *p*-toluidine (1.0 mmol), DMSO/*o*-DCB (by volume, 2.5 mL/7.5 mL) were added into a single neck flask (25 mL). Then the reaction was heated at 100 °C for 24 h, 120 °C for 24 h and 160 °C for 48 h. After cooling to the room temperature, the mixture was poured into 150 mL 0.1 M HCl aqueous, washed with DMF twice, then with water once (at least 10 h each time) and finally the sample was freeze-dried. The product are yellow powder (0.162 g, 70%).

### 2.1.6 Synthesis of CTF-HUST-d1, CTF-HUST-e1 and CTF-HUST-d2

CTF-HUST-d1, CTF-HUST-e1 and CTF-HUST-d2 were obtained using a similar synthesis process as CTF-HUST-D1, CTF-HUST-E1 and CTF-HUST-D2, except that *p*-toluidine was not added and DMSO (10 mL) was substituted by the mixed solvents (CTF-HUST-d1: 145 mg, 69% , CTF-HUST-e1: 167 mg, 80%, CTF-HUST-d2: 141 mg, 61%).

## 3. Photocatalytic oxidation of sulfides.

In a typical reaction, sulfide (0.5 mmol), CTF photocatalyst (0.01 mmol calculated based on repeating unit) were added to 5 mL of CH<sub>3</sub>OH in a Pyrex vessel. After the reaction mixture was stirred for 30 min in dark to reach adsorption equilibrium, O<sub>2</sub> was purged into the Pyrex vessel to raise the initial pressure to 0.1 MPa. The reaction mixture illuminated with blue LED irradiation at room temperature, and the products were quantitatively analysed by gas chromatography (GC) equipped with a flame ionization detector (FID) using chlorobenzene as the internal standard.

Conversions for oxidation of substrates, yields, and selectivities to the desired products were defined as follows:

$$\text{Conv. [\%]} = [(C_0 - C_s) / C_0] \times 100$$

$$\text{Yield [\%]} = C_p / C_0 \times 100$$

$$\text{Sel. [\%]} = [C_p / (C_0 - C_s)] \times 100$$

where C<sub>0</sub> is the initial concentration of substrates, and C<sub>s</sub> and C<sub>p</sub> are the concentrations of substrates and products at a certain time during the photocatalytic reaction.

#### 4. PXRD patterns of CTF-HUST-D1 and CTF-HUST-E1 synthesized under different conditions.

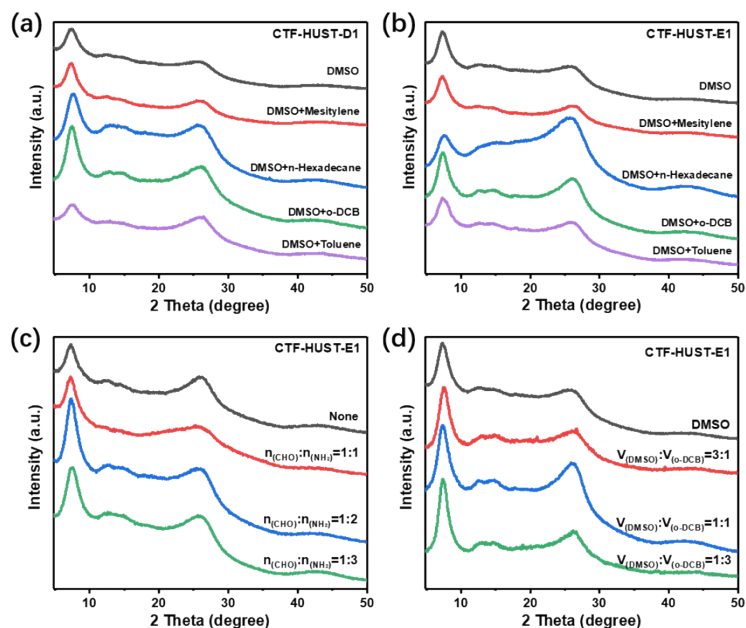

**Figure S1.** Experimental powder X-ray diffraction patterns of the crystalline CTFs, (a, b) the comparison of different mixed solvents for CTF-HUST-D1 and CTF-HUST-E1, (c) the optimization of p-toluidine addition, (d) the ratio of mixed solvent DMSO and o-dichlorobenzene.

#### 5. SEM images and Brunauer-Emmett-Teller (BET) surface areas of CTF-HUST-D1 and CTF-HUST-E1.

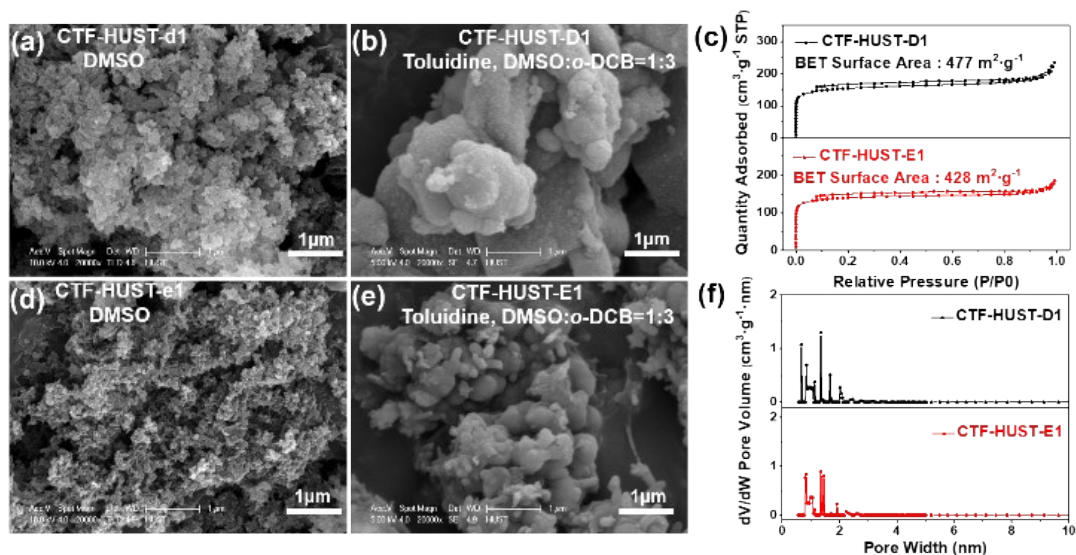

**Figure S2.** SEM images of CTF-HUST-d1 (a), CTF-HUST-D1 (b), CTF-HUST-e1 (d) and CTF-HUST-E1 (e), (c) N<sub>2</sub> adsorption and desorption isotherms (77 K) of CTF-HUST-D1 (black) and CTF-HUST-E1 (red), (f) The pore size distributions of CTF-HUST-D1 (black) and CTF-HUST-E1 (red).

## 6. TEM images of CTF-HUST-D1 and CTF-HUST-E1.

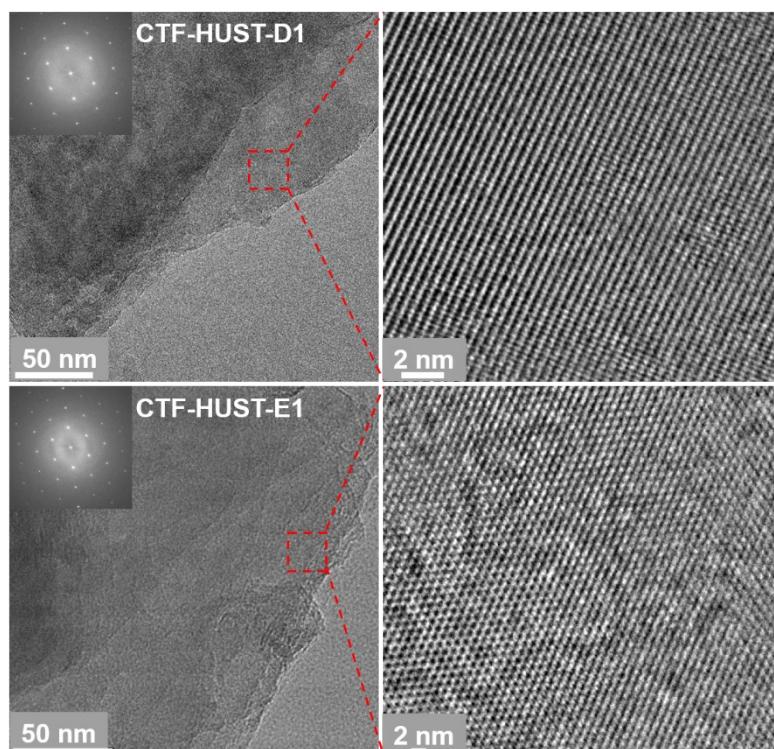

**Figure S3.** HR-TEM images of CTF-HUST-D1 (a, b) and CTF-HUST-E1 (c, d, insets: FFT images).

## 7. HAADF-STEM and mapping image of CTF-HUST-D1 and CTF-HUST-E1.

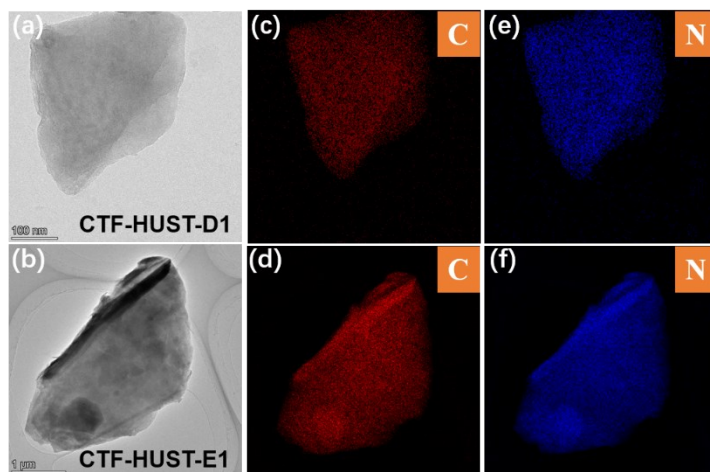

**Figure S4.** HAADF-STEM image of CTF-HUST-D1 (a) and CTF-HUST-E1 (b). The mapping images for carbon (c, d) and nitrogen (e, f) for CTF-HUST-D1 and CTF-HUST-E1.

## 8. Thermal stability of CTF-HUST-D1 and CTF-HUST-E1.

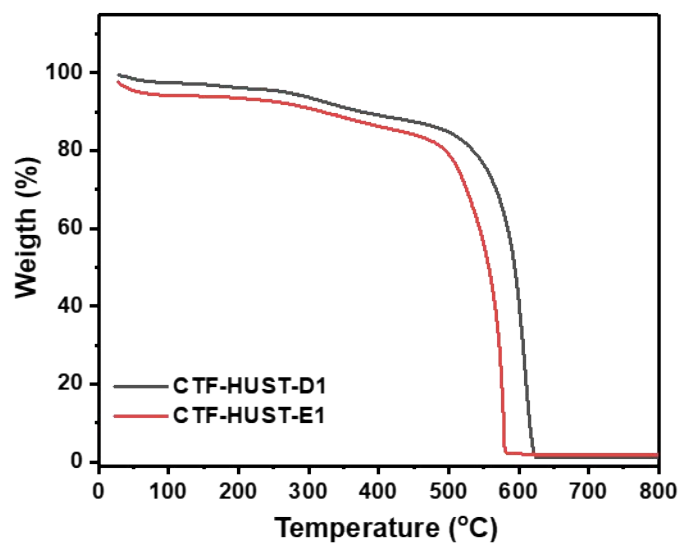

Figure S5. TGA curves of CTF-HUST-D1 and CTF-HUST-E1 under air atmosphere.

## 9. Powder X-ray diffraction patterns and FT-IR spectra of CTF-HUST-D2.

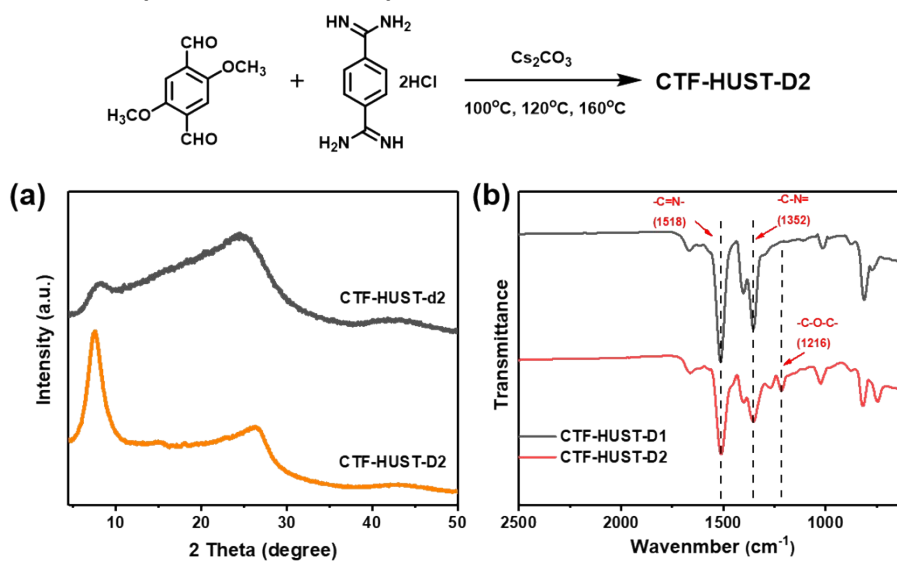

Figure S6. Powder X-ray diffraction patterns (a) and FT-IR spectra (b) of CTF-HUST-D2.



## 10. Structural characterization of CTF-HUST-D2.

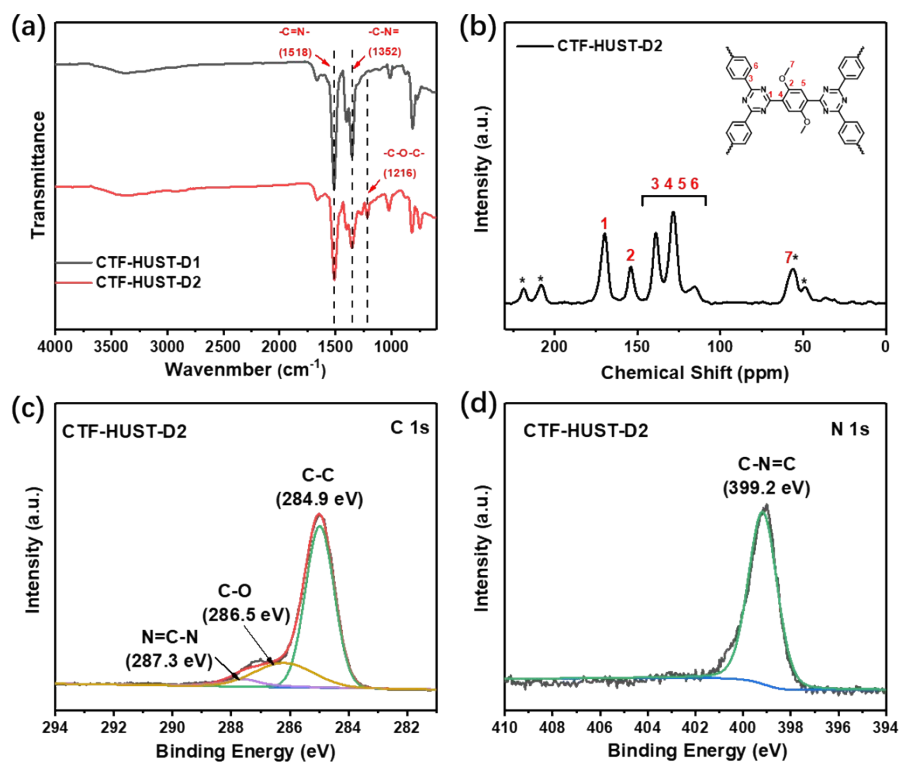

**Figure S7.** FT-IR spectra (a), solid-state  $^{13}\text{C}$  NMR spectra (b) and high-resolution XPS C1s and N1s spectra (c, d) for CTF-HUST-D2.

## 11. HR-TEM images of CTF-HUST-D2.

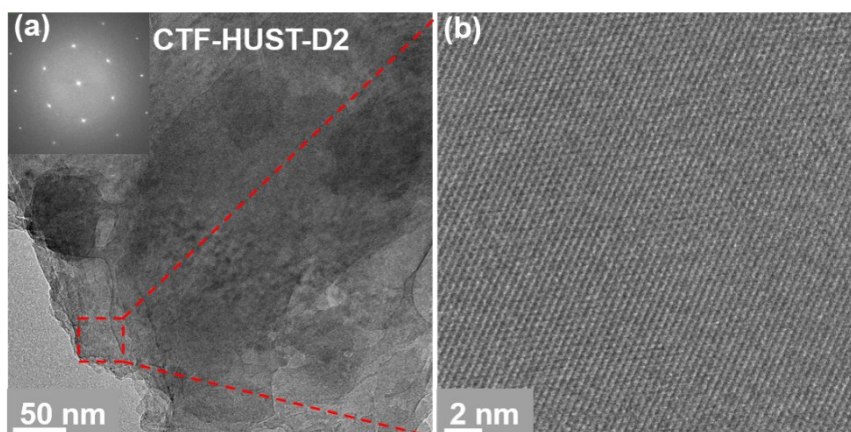

**Figure S8.** HR-TEM images of CTF-HUST-D2 (a and b, insets: FFT images)

## 12. Thermal stability of CTF-HUST-D2.

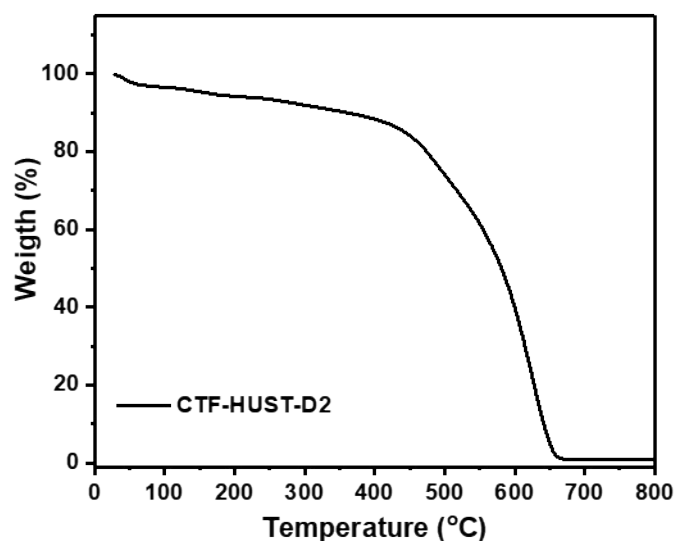

Figure S9. TGA curves of CTF-HUST-D2 under air atmosphere.

## 13. N<sub>2</sub> adsorption and desorption isotherms and SEM images of CTF-HUST-D2.

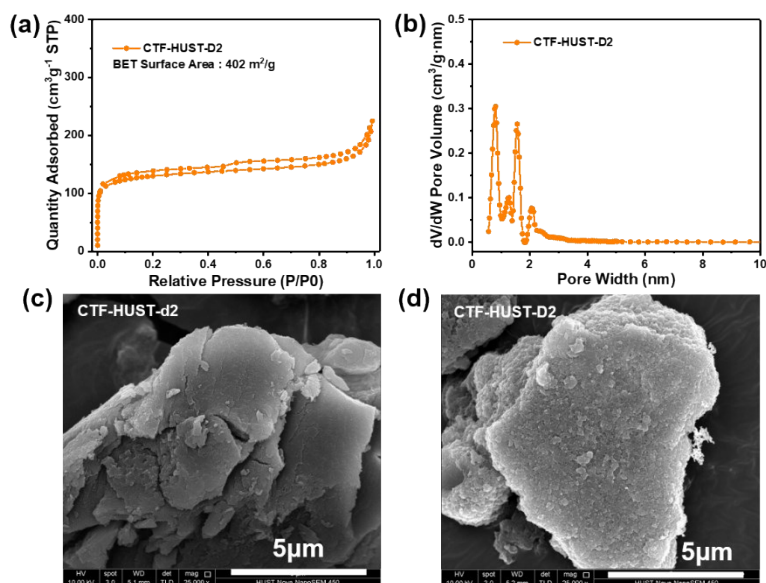

Figure S10. (a, b) N<sub>2</sub> adsorption and desorption isotherms (77 K) and the pore size distributions of CTF-HUST-D2. (c, d) The SEM images of CTF-HUST-d2 and CTF-HUST-D2. The BET surface area is calculated to be 32 m<sup>2</sup> g<sup>-1</sup>. The lower surface area is due to the bulky methoxy groups that blocked the pores.

#### 14. In-situ ESR spectra of DMPO- $\text{O}_2^-$

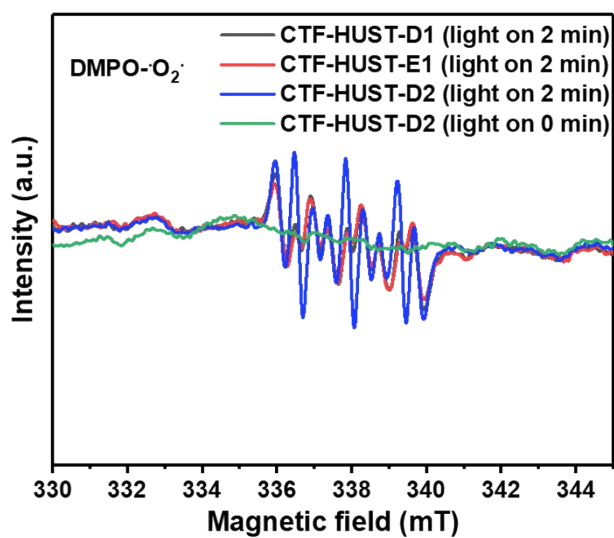

**Figure S11.** The in-situ ESR spectra for  $\text{O}_2^-$  detection by DMPO as the trapper under visible-light irradiation.

#### 15. UV-Visible diffuse reflectance spectra of CTF-HUST-D1, CTF-HUST-E1 and CTF-HUST-D2.

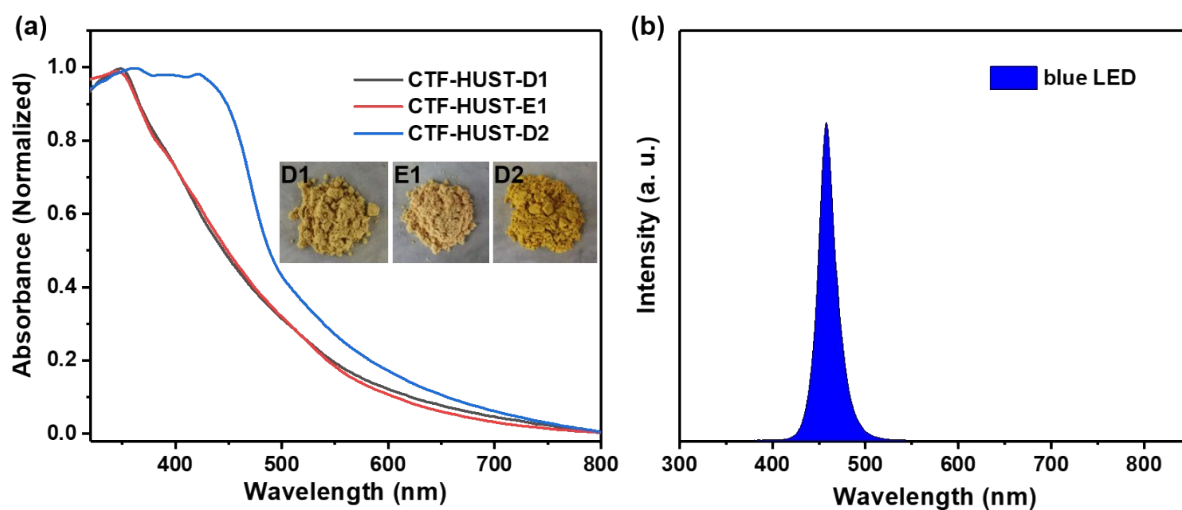

**Figure S12.** (a) UV-Visible diffuse reflectance spectra of CTF-HUST-D1, CTF-HUST-E1 and CTF-HUST-D2. (b) The light-emitting spectrum of the blue LEDs.

## 16. Electrochemical impedance of CTFs.

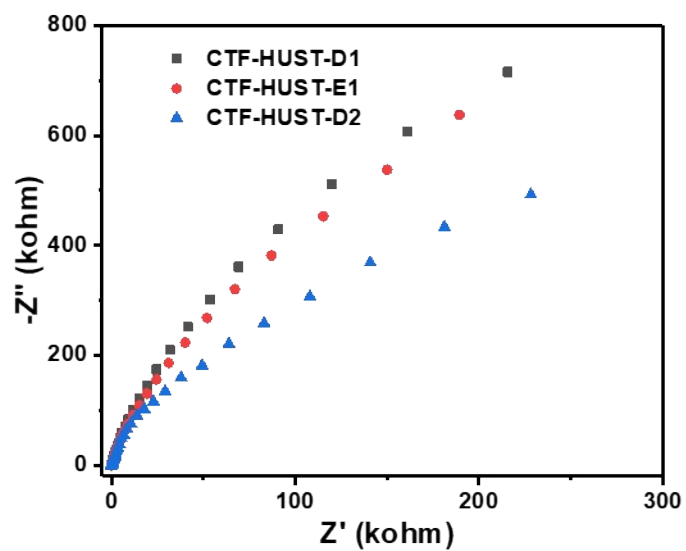

**Figure S13.** EIS Nyquist plots of CTF-HUST-D1, CTF-HUST-E1 and CTF-HUST-D2.

## 17. Electrochemical impedance of CTFs.

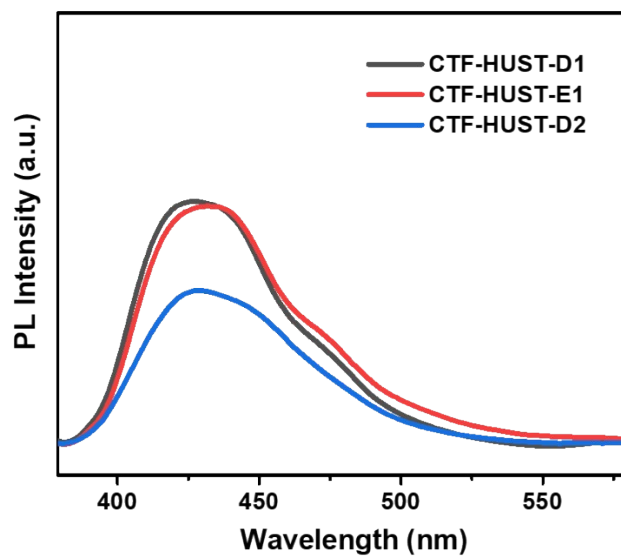

**Figure S14.** Photoluminescence spectra of CTF-HUST-D1, CTF-HUST-E1 and CTF-HUST-D2.

## 18. Optical band gaps and Mott-Schottky of CTFs

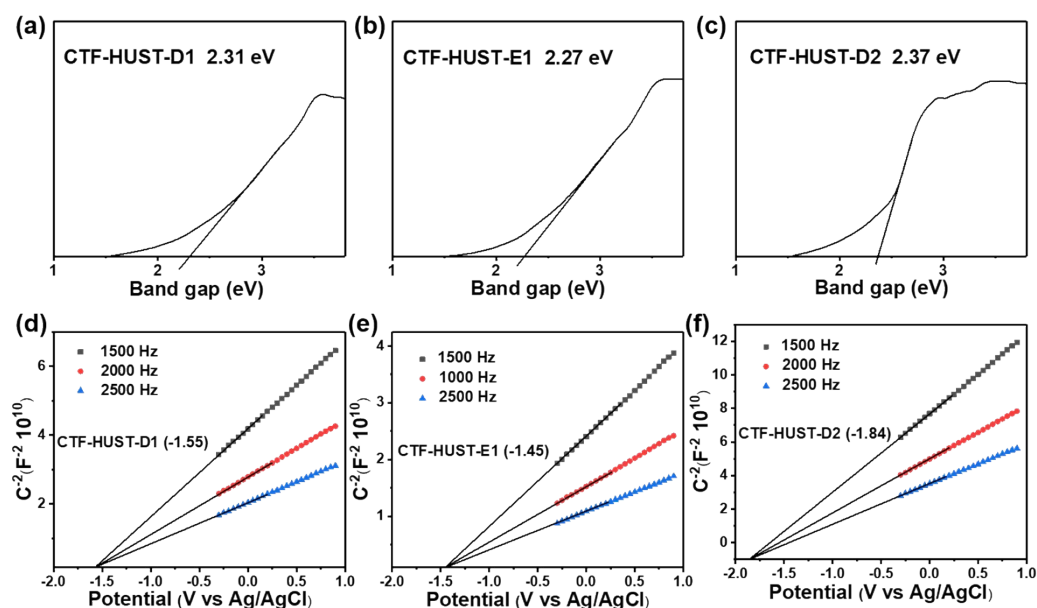

**Figure S15.** (a, b, c) Band gap of CTFs which was calculated by Kubelka-Munk function based on DRS. (d, e, f) Mott-Schottky test results of CTFs.

## 19. The FWHM and ordinate intensity of the (100) plane for different CTFs.

**Table S1.** The FWHM and ordinate intensity of the (100) plane for different CTFs

| Entry        | W (FWHM) <sup>a</sup> | intensity <sup>b</sup> |
|--------------|-----------------------|------------------------|
| CTF-HUST-HC1 | 1.91                  | 4950                   |
| CTF-HUST-C1  | 1.67                  | 5813                   |
| CTF-HUST-D1  | 1.52                  | 9090                   |
| CTF-HUST-E1  | 1.45                  | 10382                  |

[a] The value is obtained by Gaussian integration. [b] The ordinate intensity of the (100) plane in the XRD pattern.

## 20. Elemental analysis results of CTF-HUST-D1 and CTF-HUST-E1 and CTF-HUST-D2

**Table S2.** Elemental analysis results of CTFs

| Sample      | C (%) |      | N (%) |      | H (%) |      | O (%) |      |
|-------------|-------|------|-------|------|-------|------|-------|------|
|             | Cal.  | Exp. | Cal.  | Exp. | Cal.  | Exp. | Cal.  | Exp. |
| CTF-HUST-D1 | 74.2  | 67.2 | 21.6  | 17.1 | 4.2   | 4.4  | -     | -    |
| CTF-HUST-E1 | 74.2  | 68.0 | 21.6  | 17.5 | 4.2   | 4.4  | -     | -    |
| CTF-HUST-D2 | 69.6  | 64.0 | 18.7  | 16.4 | 4.5   | 4.5  | 7.1   | 8.2  |

## 21. Comparison of different CTFs for photocatalytic selective oxidation of thioanisole

**Table S3:** Comparison of different CTFs for the visible light photocatalytic selective oxidation of thioanisole

| Entry | Photocatalyst | Conv. [%] | Sel. [%] |
|-------|---------------|-----------|----------|
| 1     | CTF-HUST-D1   | 13        | 99       |
| 2     | CTF-HUST-E1   | 7         | 99       |
| 3     | CTF-HUST-D2   | 55        | 99       |

Reaction conditions: Photocatalyst (0.01 mmol calculated based on repeating unit), thioanisole (0.5 mmol), CH<sub>3</sub>OH (1 mL), 3 W × 4 blue LEDs, 30 min, air (1atm). The conversion and selectivity were determined by GC-FID using chlorobenzene as the internal standard.

## 22. Quenching experiments of CTF-HUST-D2

**Table S4.** Quenching experiments to determine the ROS for the blue light-induced selective oxidation of thioanisole into sulfoxide with air by CTF-HUST-D2 <sup>[a]</sup>

| Entry            | Quencher (equiv.)       | Roles                                  | Conv. (%) <sup>[b]</sup> | Sel. (%) <sup>[b]</sup> |
|------------------|-------------------------|----------------------------------------|--------------------------|-------------------------|
| 1                | --                      | standard                               | 64                       | 94                      |
| 2                | N <sub>2</sub> (--)     | O <sub>2</sub> replacement             | 0                        | --                      |
| 3                | <i>p</i> -BQ (0.2)      | ·O <sub>2</sub> <sup>-</sup> scavenger | 0                        | --                      |
| 4                | AgNO <sub>3</sub> (1)   | electron scavenger                     | 3                        | --                      |
| 5 <sup>[c]</sup> | CD <sub>3</sub> OD (--) | singlet oxygen maintainer              | 66                       | 90                      |

[a] Reaction conditions: sulfide (0.5 mmol), CTF-HUST-D2 (0.01 mmol calculated based on repeating unit), blue LEDs irradiation (3 W × 4), CH<sub>3</sub>OH (1 mL), air (1 atm), 45 min. [b] Determined by GC-FID using chlorobenzene as the internal standard, conversion of sulfide, selectivity of sulfoxide. [c] CD<sub>3</sub>OD (1 mL).

### 23. Comparison of the photocatalytic performance of CTF-HUST-D2 with reported materials

**Table S5.** Comparison of the photocatalytic performance with other reported materials under similar conditions.

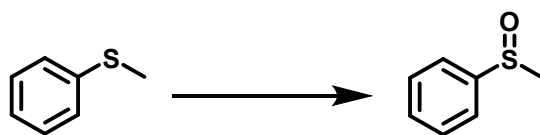

| Catalyst                              | Condition                                                  | Conv.(%)  | Sel.(%)   | T(h)       | Ref.             |
|---------------------------------------|------------------------------------------------------------|-----------|-----------|------------|------------------|
| [Ru(bpy) <sub>3</sub> ] <sup>3+</sup> | 500 W halogen lamp,<br>CH <sub>3</sub> CN/H <sub>2</sub> O | 97        | -         | 4          | [2]              |
| TiO <sub>2</sub>                      | 300 W Xelamp, CH <sub>3</sub> OH                           | 83        | 92        | 4          | [3]              |
| 1,2-DHA-TiO <sub>2</sub>              | TEMPO, 520 nm, CH <sub>3</sub> OH                          | 90        | 91        | 1.3        | [4]              |
| PPET3-N2                              | White LED, CH <sub>3</sub> OH                              | 69        | -         | 8.0        | [5]              |
| ARS-TiO <sub>2</sub>                  | 300 W Xelamp, CH <sub>3</sub> OH                           | 84        | 90        | 3.0        | [6]              |
| <b>CTF-HUST-D2</b>                    | <b>3 W blue LED, CH<sub>3</sub>OH</b>                      | <b>90</b> | <b>94</b> | <b>1.0</b> | <b>This work</b> |

### 24. References

- [1] K. W. Y. Wang, L. M.; Wang, X.; Guo, L. P.; Cheng, G.; Zhang, C.; Jin, S. B.; Tan, B. E.; Cooper, A., *Angew. Chem. Int. Ed.* **2017**, *56*, 14149-14153.
- [2] S.-L. L. Jyh-Myng Zen, Annamalai Senthil Kumar, and Mung-Seng Hsia, *Angew. Chem. Int. Ed.* **2003**, *115*, 597-599.
- [3] X. Lang, W. R. Leow, J. Zhao, X. Chen, *Chem Sci* **2015**, *6*, 1075-1082.
- [4] H. Hao, X. Li, X. Lang, *Applied Catalysis B: Environmental* **2019**, *259*, 118038.
- [5] J. Li, Z. An, J. Sun, C. Tan, D. Gao, Y. Tan, Y. Jiang, *ACS Appl Mater Interfaces* **2020**, *12*, 35475-35481.
- [6] X. Lang, J. Zhao, X. Chen, *Angew Chem Int Ed* **2016**, *55*, 4697-4700.
